# Supplementary figures and images for: Resorcinol Derivative as an Environmentally Friendly Low Carbon Steel Inhibitor in HCl Medium
Source: PubMed Central journal article supplement — ACS Omega. 2022 May 16;7(21):17609–19. doi: 10.1021/acsomega.2c00153 (PMC9161249; doi:10.1021/acsomega.2c00153), 2022-05-16

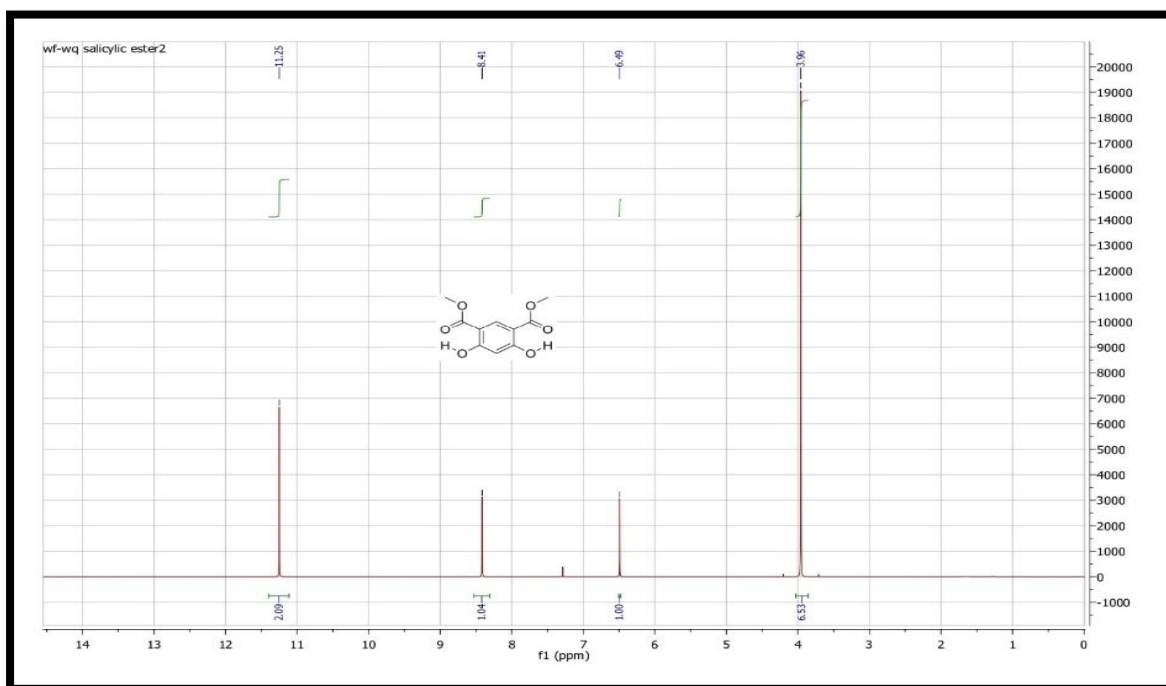

$H^1$ -NMR for the compound DDIP

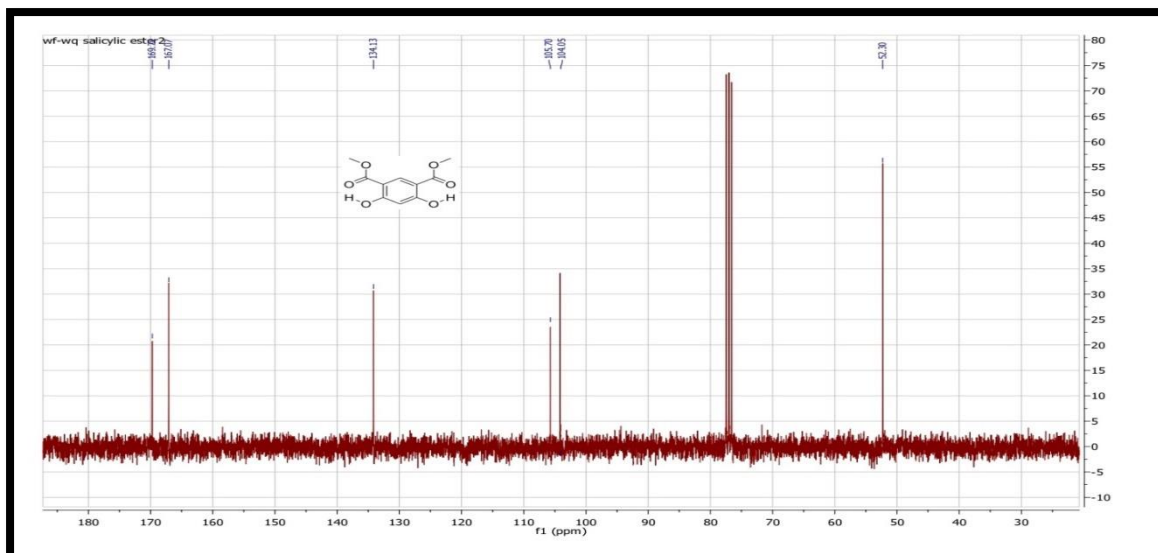

$^{13}\text{C}$ -NMR for the compound DDIP

Supplement: ao2c00153_si_001.pdf [file ao2c00153_si_001.pdf]
